# Supplementary material
Source: PubMed Central journal article supplement (PMC5923141)
Supplement: AAC.00018-18_zac005187099s1.pdf [file AAC.00018-18_zac005187099s1.pdf]

1 **Supplementary data**

2

3 **Bacterial strains and antimicrobial susceptibility testing**

4 A total of 905 non-duplicated clinical isolates (569 *Escherichia coli*, 278 *Klebsiella pneumoniae*,  
5 36 *Enterobacter cloacae* and 22 *Citrobacter freundii*) collected from a tertiary hospital in  
6 Guangdong province in China between 2015 and March 2016 were randomly selected for  
7 molecular screening for *mcr-1*. The species identification and antimicrobial susceptibility testing  
8 were conducted using VITEK<sup>®</sup> 2 system (bioMerieux, France). *E. coli* ATCC 25922 and  
9 *Pseudomonas aeruginosa* ATCC 27853 were used as quality control strains. The colistin  
10 susceptibility testing of *mcr-1* positive strains, their *E. coli* J53<sup>AZ-R</sup> transconjugants and pQF50  
11 vector *E. coli* DH5 $\alpha$  constructs were examined using broth microdilution method and interpreted  
12 according to the EUCAST breakpoints.

13

14 **Analysis of *mcr-1* expression**

15 The *mcr-1* genes with its natural promoter regions were amplified by PCR using the primers in  
16 **Table S2** and cloned into plasmid pQF50 using the Quick-Fusion Seamless Cloning Kit (Biotool,  
17 USA). Subsequently, the resultant recombinant plasmids were transferred into *E. coli* DH5 $\alpha$  and  
18 selected on agar plates with ampicillin (100 $\mu$ g/ml), followed by PCR evaluation. Single colonies  
19 of the *E. coli* DH5 $\alpha$  transformants were grown overnight in LB media with 100  $\mu$ g/ml ampicillin  
20 at 37°C with shaking at 200 rpm. On the next day, overnight bacterial culture was 1:100 diluted in  
21 fresh LB media, and cultured at 37°C until mid-log phase (OD ~0.5). The RNA of *E. coli* DH5 $\alpha$

22 transformants was then extracted using the Trizol method, and the expression of *mcr-1* was  
23 evaluated by real-time reverse-transcription PCR using the PrimeScript™ RT reagent Kit and  
24 SYBR® Premix Ex Taq™ II (Tli RNaseH Plus) kit (TAKARA, China), using the primers listed in  
25 **Table S2**. The qRT-PCR was performed with three RNA sample preparations from three  
26 independent experiments. In addition, these *E. coli* DH5 $\alpha$  transformants were subject to  
27 susceptibility testing using the broth microdilution method described above.

28

### 29 **The *mcr-1* promoter activity analysis**

30 In order to explore the relationship between sequence variation and promoter activity, the *mcr-1*  
31 promoter regions from different plasmids were amplified by PCR using the primers on **Table S2**,  
32 and then cloned into a promoterless lacZ reporter plasmid pQF50 using the Quick-Fusion  
33 Seamless Cloning Kit (Biotool, USA), followed by electroporation into *E. coli* BW25113  
34 (another *E. coli* strain without endogenous  $\beta$ -galactosidase compared to DH5 $\alpha$ . The  $\beta$ -gal  
35 activity of those strains driven by the *mcr-1* promoters was detected using the Multi-plate Reader  
36 (Biotek, USA), using *E. coli* BW25113 and *E. coli* BW25113- pQF50 as controls.

37

38

39

41 **TABLE S1. Characteristics of patients and *mcr-1*-positive isolates**

| Characteristics                                           | GZ49260                                                                                                                                                                                                               | GZ49263                                                                                                                                                                                               | GZ49266                                                                                                                                                                                                                                   | GZ49269                                                                                                                                                                                                                                                                                         | GZ49271                                                                                                                            | GZ49273                   |
|-----------------------------------------------------------|-----------------------------------------------------------------------------------------------------------------------------------------------------------------------------------------------------------------------|-------------------------------------------------------------------------------------------------------------------------------------------------------------------------------------------------------|-------------------------------------------------------------------------------------------------------------------------------------------------------------------------------------------------------------------------------------------|-------------------------------------------------------------------------------------------------------------------------------------------------------------------------------------------------------------------------------------------------------------------------------------------------|------------------------------------------------------------------------------------------------------------------------------------|---------------------------|
| Source of isolate                                         | Urine                                                                                                                                                                                                                 | Blood                                                                                                                                                                                                 | Urine                                                                                                                                                                                                                                     | Urine                                                                                                                                                                                                                                                                                           | Cervical fluid                                                                                                                     | Ascites                   |
| Age (year)/gender                                         | 81/F                                                                                                                                                                                                                  | 48/M                                                                                                                                                                                                  | 66/M                                                                                                                                                                                                                                      | 59/F                                                                                                                                                                                                                                                                                            | 43/F                                                                                                                               | 56/F                      |
| Ward                                                      | Nephrology                                                                                                                                                                                                            | Radiotherapy                                                                                                                                                                                          | Urinary Surgery                                                                                                                                                                                                                           | Oncology                                                                                                                                                                                                                                                                                        | Gynaecology                                                                                                                        | Hepatology                |
| Infection                                                 | Bacteriuria                                                                                                                                                                                                           | Sepsis                                                                                                                                                                                                | Urinary tract infection                                                                                                                                                                                                                   | Urinary tract infection                                                                                                                                                                                                                                                                         | Cervical infection                                                                                                                 | Intra-abdominal infection |
| Species                                                   | <i>E. coli</i>                                                                                                                                                                                                        | <i>E. coli</i>                                                                                                                                                                                        | <i>E. coli</i>                                                                                                                                                                                                                            | <i>E. coli</i>                                                                                                                                                                                                                                                                                  | <i>K. pneumoniae</i>                                                                                                               | <i>E. coli</i>            |
| ST                                                        | 744                                                                                                                                                                                                                   | 7572                                                                                                                                                                                                  | 156                                                                                                                                                                                                                                       | 4204                                                                                                                                                                                                                                                                                            | 976                                                                                                                                | 1196                      |
| Acquired Resistance genes                                 | <i>aac(3)-IId</i> , <i>strAB</i> , <i>aadA1</i> , <i>bla<sub>TEM-1</sub></i> , <i>bla<sub>CTX-M-130</sub></i> , <i>mcr-1</i> , <i>floR</i> , <i>sul1</i> , <i>sul2</i> , <i>tet(A)</i> , <i>tet(B)</i> , <i>dfrA1</i> | <i>aadA1</i> , <i>aph(3')-Ia</i> , <i>strAB</i> , <i>bla<sub>OXA-10</sub></i> , <i>mcr-1</i> , <i>qnrS1</i> , <i>cmlA1</i> , <i>arr-2</i> , <i>sul2</i> , <i>sul3</i> , <i>tet(A)</i> , <i>dfrA14</i> | <i>aadA2</i> , <i>aph(3')-Ila</i> , <i>aph(3')-IId</i> , <i>strAB</i> , <i>rmtB</i> , <i>bla<sub>CTX-M-65</sub></i> , <i>bla<sub>TEM-1</sub></i> , <i>mcr-1</i> , <i>floR</i> , <i>sul1</i> , <i>sul2</i> , <i>tet(A)</i> , <i>dfrA12</i> | <i>aadA16</i> , <i>aph(3')-IIa</i> , <i>aph(3')-IId</i> , <i>strAB</i> , <i>aac(6')Ib-cr</i> , <i>bla<sub>CTX-M-14</sub></i> , <i>bla<sub>TEM-1</sub></i> , <i>bla<sub>CTX-M-55</sub></i> , <i>mcr-1</i> , <i>mphA</i> , <i>floR</i> , <i>arr-3</i> , <i>sul1</i> , <i>sul2</i> , <i>dfrA27</i> | <i>strAB</i> , <i>bla<sub>SHV-27</sub></i> , <i>mcr-1</i> , <i>qnrS1</i> , <i>fosA</i> , <i>floR</i> , <i>sul2</i> , <i>tet(A)</i> | <i>mcr-1</i>              |
| Plasmid replicons                                         | FIB, X4, I1, FIC, Q1, FII                                                                                                                                                                                             | HI2, FIC, FIB, HI2A                                                                                                                                                                                   | I1, I2, X1, FIB, p011                                                                                                                                                                                                                     | N, X4, FII, FIB                                                                                                                                                                                                                                                                                 | FII, FIB, X4                                                                                                                       | I1, I2, FII               |
| <i>mcr-1</i> plasmids replicon                            | X4                                                                                                                                                                                                                    | Unknown                                                                                                                                                                                               | I2                                                                                                                                                                                                                                        | X4                                                                                                                                                                                                                                                                                              | X4                                                                                                                                 | I2                        |
| Antimicrobial susceptibility testing (µg/ml) <sup>a</sup> |                                                                                                                                                                                                                       |                                                                                                                                                                                                       |                                                                                                                                                                                                                                           |                                                                                                                                                                                                                                                                                                 |                                                                                                                                    |                           |
| Amikacin                                                  | ≤2                                                                                                                                                                                                                    | ≤2                                                                                                                                                                                                    | ≥64                                                                                                                                                                                                                                       | ≤2                                                                                                                                                                                                                                                                                              | ≤2                                                                                                                                 | ≤2                        |
| Ampicillin                                                | ≥32                                                                                                                                                                                                                   | ≥32                                                                                                                                                                                                   | ≥32                                                                                                                                                                                                                                       | ≥32                                                                                                                                                                                                                                                                                             | ≥32                                                                                                                                | ≥32                       |
| Ampicillin-sulbactam                                      | ≥32                                                                                                                                                                                                                   | 16                                                                                                                                                                                                    | ≥32                                                                                                                                                                                                                                       | ≥32                                                                                                                                                                                                                                                                                             | 4                                                                                                                                  | 4                         |
| Piperacillin-tazobactam                                   | ≤4                                                                                                                                                                                                                    | ≤4                                                                                                                                                                                                    | ≤4                                                                                                                                                                                                                                        | ≤4                                                                                                                                                                                                                                                                                              | ≤4                                                                                                                                 | ≤4                        |
| Cefazolin                                                 | ≥64                                                                                                                                                                                                                   | ≤4                                                                                                                                                                                                    | ≥64                                                                                                                                                                                                                                       | ≥64                                                                                                                                                                                                                                                                                             | ≤4                                                                                                                                 | ≤4                        |
| Ceftriaxone                                               | ≥64                                                                                                                                                                                                                   | ≤1                                                                                                                                                                                                    | ≥64                                                                                                                                                                                                                                       | ≥64                                                                                                                                                                                                                                                                                             | ≤1                                                                                                                                 | ≤1                        |
| Ceftazidime                                               | 4                                                                                                                                                                                                                     | ≤1                                                                                                                                                                                                    | 4                                                                                                                                                                                                                                         | 16                                                                                                                                                                                                                                                                                              | ≤1                                                                                                                                 | ≤1                        |
| Cefepime                                                  | 4                                                                                                                                                                                                                     | ≤1                                                                                                                                                                                                    | 2                                                                                                                                                                                                                                         | 4                                                                                                                                                                                                                                                                                               | ≤1                                                                                                                                 | ≤1                        |
| Cefotetan                                                 | ≤4                                                                                                                                                                                                                    | ≤4                                                                                                                                                                                                    | ≤4                                                                                                                                                                                                                                        | ≤4                                                                                                                                                                                                                                                                                              | ≤4                                                                                                                                 | ≤4                        |
| Imipenem                                                  | ≤1                                                                                                                                                                                                                    | ≤1                                                                                                                                                                                                    | ≤1                                                                                                                                                                                                                                        | ≤1                                                                                                                                                                                                                                                                                              | ≤1                                                                                                                                 | ≤1                        |
| Ertapenem                                                 | ≤0.5                                                                                                                                                                                                                  | ≤0.5                                                                                                                                                                                                  | ≤0.5                                                                                                                                                                                                                                      | ≤0.5                                                                                                                                                                                                                                                                                            | ≤0.5                                                                                                                               | ≤0.5                      |
| Levofloxacin                                              | ≥8                                                                                                                                                                                                                    | 2                                                                                                                                                                                                     | ≥8                                                                                                                                                                                                                                        | ≥8                                                                                                                                                                                                                                                                                              | 1                                                                                                                                  | ≥8                        |
| Ciprofloxacin                                             | ≥4                                                                                                                                                                                                                    | 2                                                                                                                                                                                                     | ≥4                                                                                                                                                                                                                                        | ≥4                                                                                                                                                                                                                                                                                              | ≤0.25                                                                                                                              | ≥4                        |
| Trimethoprim-sulfamethoxazole                             | ≥320                                                                                                                                                                                                                  | ≥320                                                                                                                                                                                                  | ≥320                                                                                                                                                                                                                                      | ≥320                                                                                                                                                                                                                                                                                            | ≤20                                                                                                                                | ≤20                       |
| Gentamicin                                                | ≥16                                                                                                                                                                                                                   | ≤1                                                                                                                                                                                                    | ≥16                                                                                                                                                                                                                                       | ≥16                                                                                                                                                                                                                                                                                             | ≤1                                                                                                                                 | ≤1                        |

|                                    |     |     |     |     |     |     |
|------------------------------------|-----|-----|-----|-----|-----|-----|
| Aztreonam                          | 16  | ≤1  | 16  | 16  | ≤1  | ≥32 |
| Tobramycin                         | ≥8  | ≤1  | ≥16 | 8   | ≤1  | ≤1  |
| Nitrofurantoin                     | ≤16 | ≤16 | ≥32 | 128 | ≤16 | 64  |
| Colistin                           | 8   | 16  | 4   | 4   | 16  | 8   |
| Polymyxin B                        | 8   | 8   | 4   | 8   | 32  | 8   |
| <i>E. coli</i> J53 transconjugants |     |     |     |     |     |     |
| Colistin                           | 4   | -   | 4   | 4   | 8   | 4   |

42 <sup>a</sup>The species identification and antimicrobial susceptibility testing were conducted using VITEK®  
43 2 system (bioMerieux, France), and interpreted by the standards of Clinical and Laboratory  
44 Standards Institute (CLSI, 2016) . *E. coli* ATCC 25922 and *Pseudomonas aeruginosa* ATCC 27853  
45 were used as quality control strains. The colistin susceptibility testing was examined using broth  
46 microdilution method and interpreted according to the EUCAST breakpoints.

47

48

49

50 **TABLE S2. Primers used in this study**

| Primers                                                 | Primer sequence* (5'→3')                             |
|---------------------------------------------------------|------------------------------------------------------|
| <i>mcr-1</i> promoter_m-F ( <i>Bam</i> HI)              | GACGTCGACTCTAGAG <u>GGATCC</u> CTTAAAAAATTGCAGTA     |
| pGZ49260/49271 <i>mcr-1</i> promoter-F ( <i>Bam</i> HI) | GACGTCGACTCTAGAG <u>GGATCC</u> CATACTCTCAAGTGTATATTC |
| pGZ49263 <i>mcr-1</i> promoter-F ( <i>Bam</i> HI)       | GACGTCGACTCTAGAG <u>GGATCC</u> GCTGAATTTACAATCCAAG   |
| pGZ49266 <i>mcr-1</i> promoter-F ( <i>Bam</i> HI)       | GACGTCGACTCTAGAG <u>GGATCC</u> CCGCTGAATTTACAATCCAA  |
| pGZ49269 <i>mcr-1</i> promoter-F ( <i>Bam</i> HI)       | GACGTCGACTCTAGAG <u>GGATCC</u> TTAAAAATAAGCCCACATA   |
| pGZ49273 <i>mcr-1</i> promoter-F ( <i>Bam</i> HI)       | GACGTCGACTCTAGAG <u>GGATCC</u> GATGTCCCTCTGGGATGCGC  |
| <i>mcr-1</i> promoter-R ( <i>Hind</i> III)              | ATACCCTCTAGCTAG <u>AAGCTT</u> GAGAACTACTCAAAAA       |
| <i>mcr-1</i> -R ( <i>Hind</i> III)                      | ATACCCTCTAGCTAG <u>AAGCTT</u> AATACGAATGGAGTGTGCGG   |
| <i>ropD</i> -F (for qRT-PCR)                            | GGGATCAACCAGGTTCAATG                                 |
| <i>ropD</i> -R (for qRT-PCR)                            | GGTGCCAGATCTTCTTCTGC                                 |
| <i>mcr-1</i> -F (for qRT-PCR)                           | CAGTTTCTTTCGCGTGCATA                                 |
| <i>mcr-1</i> -R (for qRT-PCR)                           | GCGTCTTTGGCGTGATAAAT                                 |

51 \*The underlined sequences denote restriction enzyme sites
